# Supplementary material for: Linear optical afterglow and nonlinear optical harmonic generation from chiral tin(iv) halides: the role of lattice distortions
Source: Royal Society of Chemistry journal article supplement (doi:10.1039/d2mh01429g), 2023-01-01
Supplement: d2mh01429g1.pdf [file d2mh01429g1.pdf]

## Supporting Information

# Linear Optical Afterglow and Nonlinear Optical Harmonic Generation from Chiral Tin(IV) Halides: the Role of Lattice Distortions

Xiao Han, Puxing Chen, Rongchao Shi, Yongshen Zheng, Siming Qi, Jialiang Xu\* and Xian-He Bu

X. Han, P. Chen, Prof. J. Xu, Prof. X.-H. Bu.  
School of Materials Science and Engineering  
Smart Sensing Interdisciplinary Science Center  
Collaborative Innovation Center of Chemical Science and Engineering (Tianjin)  
Nankai University  
Tongyan Road 38, Tianjin 300350, P. R. China  
E-mail: [jialiang.xu@nankai.edu.cn](mailto:jialiang.xu@nankai.edu.cn)

### Table of Contents

|                                |     |
|--------------------------------|-----|
| Experimental Procedures .....  | S2  |
| Supplementary Tables.....      | S4  |
| Supplementary Figures .....    | S7  |
| Supplementary References ..... | S17 |

## Experimental Procedures

**Materials.** Tin (IV) chloride pentahydrate ( $\text{SnCl}_4 \cdot 5\text{H}_2\text{O}$ , Energy Chemical, 99%), hydrochloric acid (HCl, Aladdin, 36 wt% in water), *R*-methyl(4-fluorobenzyl)amine (*R*-FMBA, Bidepharm, 98%), *S*-methyl(4-fluorobenzyl)amine (*S*-FMBA, Bidepharm, 98%), *rac*-methyl(4-fluorobenzyl)amine (*rac*-FMBA, Bidepharm, 98%), *R*-methyl(4-chlorobenzyl)amine (*R*-CIMBA, Bidepharm, 98%), *S*-methyl(4-chlorobenzyl)amine (*S*-CIMBA, Bidepharm, 98%), *rac*-methyl(4-chlorobenzyl)amine (*rac*-CIMBA, Bidepharm, 98%). Chemicals listed above are commercially available and used without further purification.

**Synthesis and crystal growth.** In double-neck flask, 1 mmol *R*-, *S*- or *rac*-XMBA ( $X = \text{F}, \text{Cl}$ ) and 0.5 mmol  $\text{SnCl}_4 \cdot 5\text{H}_2\text{O}$  were added into 5-7 mL HCl solution to form white precipitation. A colorless clear solution was obtained after continual heating and stirring. Then the solution cooled to the room temperature slowly and the target crystals were formed. Subsequently, the crystals should be filtered and washed with *n*-hexane, and thoroughly dried in vacuum drying oven.

**Characterization.** Single-crystal X-ray diffraction data of *R*-, *S*- or *rac*-XMBA ( $X = \text{F}, \text{Cl}$ ) were collected using a Rigaku XtaLAB MM007 CCD diffractometer with Mo  $K\alpha$  radiation ( $\lambda = 0.71073 \text{ \AA}$ ) at 100 K. The structures of crystals were solved and refined using Olex2<sup>1</sup>. Powder X-ray diffraction (PXRD) spectra were recorded on a Rigaku D/Max-2500 diffractometer at 40 kV, 100 mA with a Cu-target tube and a graphite monochromator. Thermogravimetric analyses (TGA) were carried out with a standard TG-DTA analyzer under air atmosphere at a heating rate of 10 °C/min, with an empty  $\text{Al}_2\text{O}_3$  crucible used as reference. UV-vis spectra were performed on a Cary 100conc spectrophotometer. X-ray photoelectron spectra (XPS) were carried out on a Thermo Scientific ESCALAB 250Xi with Al  $K\alpha$  radiation. The binding energy was calibrated using the C 1s photoelectron peak at 284.6 eV as the reference. UV-vis absorbance spectra and UV-vis-NIR spectra were recorded with UV 2600 and PerkinElmer LAMBDA 1050, respectively. The linear circular dichroism (CD) spectra were collected using BioLogic MOS-450 CD spectrometer in a transmission geometry. Edinburgh FS5 fluorescence spectrometer was applied to collect the luminescence spectra, lifetimes and quantum yields. Luminescent decay experiments were measured on an Edinburgh FS5 spectrometer using time-correlated single photon counting (TCSPC). The PL absolute quantum yields were defined as the number of photons emitted per photon absorbed by the systems and measured with an integrating sphere.

**Nonlinear optical measurements.** The nonlinear optical (NLO) measurements were conducted using a home-built multiphoton nonlinear optical microscope system. Briefly, a commercial femtosecond pump (Mai Tai HP, <100 fs, 80 MHz, wavelength ranging from 690 to 1040 nm) in reflection geometry. A laser beam is incident on the samples with an incident angle  $\gamma$  ( $\gamma = 45^\circ$ ) and the generated SHG signals are collected in the reflection configuration. The linearly polarized pump was altered with the  $\lambda/2$  plate. The second-order NLO susceptibility of the samples was determined by using Y-cut quartz and urea crystal as the reference.

**DFT calculations.** The DFT calculations were implemented in Vienna Ab initio Simulation Package (VASP 5.4.4) adopting the projector augmented-wave method (PAW) to deal with the ion-electron interaction<sup>2,3</sup>. We selected the generalized gradient approximation (GGA) of Perdew-Burke-Ernzerhof (PBE) to approximate the exchange-correlation energy<sup>4</sup>. Considering the nonbonding and long-range interaction in the hybrid organic-inorganic metal halides, the van der Waals (vdW) correction (DFT-D3) was adopted in the calculations<sup>5</sup>. The plane-wave basis set was defined by the energy cut-off at 520 eV. The energy convergence criterion for electronic iteration was set to be 10<sup>-5</sup> eV. The structural relaxation was performed until the Hellmann-Feynman forces on each atom are less than 0.01 eV/Å. A  $\Gamma$ -centered  $3 \times 6 \times 3$  grid was adopted to simulate the k-space integrations. To obtain reasonable electronic bandgaps, the Heyd-Scuseria-Ernzerhof (HSE) hybrid density functional calculations are also performed<sup>6</sup>.

**Quantification of the second-order NLO coefficient ( $d_{\text{eff}}$ ).** The SHG signal reflected from the front surface of crystals and quartz reference has been collected for the determination of second-order NLO coefficient. The polarization of the incident light and the reflected SHG signal of both samples and Y-cut quartz are *p*-polarized. We assume that the birefringence is negligible and the refractive index of air is 1. The electric field of reflected SHG intensity of the front surface can be calculated by the equation:

$$E_p = \frac{n(\omega)\cos\theta - n(2\omega)\cos\theta_i}{\cos\theta + n(2\omega)\cos\theta_i} \cdot \frac{P_{NLP}^{(2)}}{\epsilon_0(n(\omega)^2 - n(2\omega)^2)} + \frac{n(2\omega)\sin\theta_i}{\cos\theta + n(2\omega)\cos\theta_i} \cdot \frac{P_{NLI}^{(2)}}{\epsilon_0 n(2\omega)^2} \quad \backslash * \text{MERGEFORMAT (S1)}$$

where  $P_{NLP}^{(2)}$  is the second-order nonlinear polarization parallel to the *p*-polarization of the transmitted fundamental wavelength and  $P_{NLI}^{(2)}$  is the second-order nonlinear polarization parallel to the direction of the transmitted fundamental wavelength propagation,  $n(\omega)$  and  $n(2\omega)$  are the refractive indexes of the sample at the fundamental wavelength and the SHG wavelength, respectively.  $\theta_i$  is the reflection angle, which is equal to the incident angle  $\theta_i$ ,  $\theta_i$  is the refraction angle of fundamental wavelength and  $\theta$  is the angle of the SHG in bulk. These angles can be calculated by the following formula:

$$n(\omega)\sin\theta_i = n(2\omega)\sin\theta = \sin\theta_i = \sin\theta \quad \backslash * \text{MERGEFORMAT (S2)}$$

For quartz, there are two independent NLO susceptibility elements.

$$\beta_{xxx} = -\beta_{xyy} = -\beta_{yyx} = -\beta_{yxx} = \beta_1 \quad \backslash * \text{MERGEFORMAT (S3)}$$

$$\beta_{xyz} = \beta_{xzy} = -\beta_{yyz} = -\beta_{yzz} = \beta_2 \quad \backslash * \text{MERGEFORMAT (S4)}$$

Here,  $\beta$  is NLO susceptibility of quartz.  $\beta_2 \approx 0.02 \beta_1$ , and  $\beta_2$  is usually negligible. In the experiment, Y-cut quartz is used as a reference and the Z-axis is vertical to the optical table.  $P_{NLP}^{(2)}$  and  $P_{NLI}^{(2)}$  can be described as:

$$P_{NLP, \text{quartz}}^{(2)} = -\epsilon_0((E_x^2 - E_y^2)\cos\theta_i + 2E_x E_y \sin\theta_i)\beta_1 \quad \backslash * \text{MERGEFORMAT (S5)}$$

$$P_{NLt,quartz}^{(2)} = \epsilon_0((E_x^2 - E_y^2)\sin\theta_i - 2E_xE_y\cos\theta_i)\beta_1 \quad \backslash* \text{MERGEFORMAT (S6)}$$

$E_x$  and  $E_y$  are the electric field of the fundamental wavelength in quartz.  $E_x$  and  $E_y$  can be described by Fresnel formulae:

$$E_x = \frac{2\cos\theta_i\cos\theta_t}{\cos\theta_i + n\cos\theta_t}E_i \quad \backslash* \text{MERGEFORMAT (S7)}$$

$$E_y = -\frac{2\cos\theta_i\sin\theta_t}{\cos\theta_i + n\cos\theta_t}E_i \quad \backslash* \text{MERGEFORMAT (S8)}$$

$n_{quartz}(980 \text{ nm}) = 1.481$  and  $n_{quartz}(490 \text{ nm}) = 1.497$ ;  $\theta_i = \theta_r = 45^\circ$ . So that  $\theta = 28.19^\circ$  and  $\theta_t = 28.52^\circ$

$$E_{rp,quartz} = 0.0884\beta_1E_i^2 \quad \backslash* \text{MERGEFORMAT (S9)}$$

For samples, we assumed that the  $P_{NLt}^{(2)}$  is negligible and

$$P_{NLP,samp}^{(2)} = \epsilon_0d_{eff}E_p^2 \quad \backslash* \text{MERGEFORMAT (S10)}$$

$$E_p = \frac{2\cos\theta_i}{\cos\theta_i + n\cos\theta_t}E_i \quad \backslash* \text{MERGEFORMAT (S11)}$$

$n_{samp}(980 \text{ nm}) = 1.639$  and  $n_{samp}(490 \text{ nm}) = 1.632$ ;  $\theta_i = \theta_r = 45^\circ$ . So that  $\theta = 28.19^\circ$  and  $\theta_t = 28.52^\circ$

$$E_{rp,samp} = 0.0440d_{eff}E_i^2 \quad \backslash* \text{MERGEFORMAT (S12)}$$

$$\frac{I_{samp}}{I_{quartz}} = \left| \frac{E_{rp,samp}}{E_{rp,quartz}} \right|^2 = \left| \frac{d_{eff}E_i^2}{\beta_1E_i^2} \right|^2 \quad \backslash* \text{MERGEFORMAT (S13)}$$

$\frac{I_{samp}}{I_{quartz}} = 796$ , the second-order nonlinear susceptibility of Y-cut quartz plate, i.e.,  $\beta_1$ , is assumed to be  $0.6 \text{ pm V}^{-1,8}$ .

Thus,  $d_{eff}^s$  of **S-C1** at 980 nm can be calculated:  $d_{eff} = 18.8 \text{ pmV}^{-1}$ .

## Supplementary Tables

**Table S1.** Crystallographic data and structure refinement details for *R*-Cl, *S*-Cl and *rac*-Cl.

| Identification code                                    | <i>R</i> -Cl                                                      | <i>S</i> -Cl                                                      | <i>rac</i> -Cl                                                    |
|--------------------------------------------------------|-------------------------------------------------------------------|-------------------------------------------------------------------|-------------------------------------------------------------------|
| Empirical formula                                      | C <sub>16</sub> H <sub>22</sub> Cl <sub>8</sub> N <sub>2</sub> Sn | C <sub>16</sub> H <sub>22</sub> Cl <sub>8</sub> N <sub>2</sub> Sn | C <sub>16</sub> H <sub>22</sub> Cl <sub>8</sub> N <sub>2</sub> Sn |
| Formula weight                                         | 644.64                                                            | 644.64                                                            | 644.64                                                            |
| Temperature/K                                          | 100                                                               | 100                                                               | 100                                                               |
| Crystal system                                         | monoclinic                                                        | monoclinic                                                        | monoclinic                                                        |
| Space group                                            | <i>P</i> 2 <sub>1</sub>                                           | <i>P</i> 2 <sub>1</sub>                                           | <i>P</i> 2 <sub>1</sub> / <i>c</i>                                |
| <i>a</i> /Å                                            | 12.2599(3)                                                        | 12.2556(2)                                                        | 14.1247(2)                                                        |
| <i>b</i> /Å                                            | 7.1234(2)                                                         | 7.10740(10)                                                       | 7.10940(10)                                                       |
| <i>c</i> /Å                                            | 14.1245(3)                                                        | 14.0867(3)                                                        | 12.3083(2)                                                        |
| $\alpha$ /°                                            | 90                                                                | 90                                                                | 90                                                                |
| $\beta$ /°                                             | 98.056(2)                                                         | 98.156(2)                                                         | 97.523(10)                                                        |
| $\gamma$ /°                                            | 90                                                                | 90                                                                | 90                                                                |
| Volume/Å <sup>3</sup>                                  | 1221.35(5)                                                        | 1214.62(4)                                                        | 1225.34(3)                                                        |
| <i>Z</i>                                               | 2                                                                 | 2                                                                 | 2                                                                 |
| $\rho_{\text{calc}}/\text{cm}^3$                       | 1.753                                                             | 1.763                                                             | 1.747                                                             |
| $\mu/\text{mm}^{-1}$                                   | 1.928                                                             | 1.938                                                             | 16.374                                                            |
| F(000)                                                 | 636.0                                                             | 636.0                                                             | 636.0                                                             |
| Reflections collected                                  | 25373                                                             | 19109                                                             | 7233                                                              |
| Data/restraints/parameters                             | 6930/1/248                                                        | 6331/1/248                                                        | 2470/0/126                                                        |
| Goodness-of-fit on F <sup>2</sup>                      | 1.050                                                             | 1.035                                                             | 1.181                                                             |
| Final R indexes [ <i>I</i> >= 2 $\sigma$ ( <i>I</i> )] | R <sub>1</sub> = 0.0206, wR <sub>2</sub> = 0.0434                 | R <sub>1</sub> = 0.0160, wR <sub>2</sub> = 0.0362                 | R <sub>1</sub> = 0.0723, wR <sub>2</sub> = 0.1945                 |
| Final R indexes [all data]                             | R <sub>1</sub> = 0.0231, wR <sub>2</sub> = 0.0441                 | R <sub>1</sub> = 0.0166, wR <sub>2</sub> = 0.0364                 | R <sub>1</sub> = 0.0736, wR <sub>2</sub> = 0.1956                 |
| Flack parameter                                        | -0.019(10)                                                        | -0.040(8)                                                         | -0.035(12)                                                        |
| CCDC                                                   | 2207677                                                           | 2207676                                                           | 2210696                                                           |

**Table S2.** Selected bond lengths (Å) for *R*-Cl, *S*-Cl and *rac*-Cl.

| <i>R</i> -Cl |           | <i>S</i> -Cl |           | <i>rac</i> -Cl |            |
|--------------|-----------|--------------|-----------|----------------|------------|
| Sn1-Cl1      | 2.4158(7) | Sn1-Cl5      | 2.4169(6) | Sn1-Cl3        | 2.4212(17) |
| Sn1-Cl6      | 2.4600(7) | Sn1-Cl4      | 2.4614(6) | Sn1-Cl3        | 2.4212(17) |
| Sn1-Cl4      | 2.4153(6) | Sn1-Cl7      | 2.4364(5) | Sn1-Cl2        | 2.4306(18) |
| Sn1-Cl3      | 2.4313(7) | Sn1-Cl3      | 2.4143(5) | Sn1-Cl2        | 2.4305(18) |
| Sn1-Cl2      | 2.4358(6) | Sn1-Cl8      | 2.4339(6) | Sn1-Cl1        | 2.4243(18) |
| Sn1-Cl5      | 2.4126(7) | Sn1-Cl6      | 2.4130(6) | Sn1-Cl1        | 2.4243(18) |
| Cl8-C8       | 1.743(3)  | Cl1-C2       | 1.744(2)  | Cl4-C6         | 1.740(8)   |
| Cl7-C1       | 1.745(3)  | Cl2-C10      | 1.744(2)  | C6-C7          | 1.367(13)  |
| N1-C7        | 1.516(3)  | N2-C15       | 1.521(3)  | N1-C2          | 1.478(12)  |
| N2-C14       | 1.511(3)  | N1-C7        | 1.515(3)  | C6-C5          | 1.397(12)  |

**Table S3.** Selected bond angles (°) for *R*-Cl, *S*-Cl and *rac*-Cl.

| <i>R</i> -Cl |           | <i>S</i> -Cl |           | <i>rac</i> -Cl |           |
|--------------|-----------|--------------|-----------|----------------|-----------|
| Cl1-Sn1-Cl6  | 87.23(2)  | Cl5-Sn1-Cl4  | 87.30(2)  | Cl3-Sn1-Cl3    | 180.0     |
| Cl1-Sn1-Cl3  | 176.75(3) | Cl5-Sn1-Cl7  | 90.70(2)  | Cl3-Sn1-Cl2    | 88.68(6)  |
| Cl1-Sn1-Cl2  | 90.76(3)  | Cl5-Sn1-Cl8  | 176.62(2) | Cl3-Sn1-Cl2    | 91.32(6)  |
| Cl4-Sn1-Cl1  | 89.88(3)  | Cl7-Sn1-Cl4  | 89.36(2)  | Cl3-Sn1-Cl2    | 91.31(6)  |
| Cl4-Sn1-Cl6  | 90.63(3)  | Cl3-Sn1-Cl5  | 89.90(2)  | Cl3-Sn1-Cl2    | 88.69(6)  |
| Cl4-Sn1-Cl3  | 90.85(3)  | Cl3-Sn1-Cl4  | 90.68(2)  | Cl3-Sn1-Cl1    | 90.72(6)  |
| Cl4-Sn1-Cl2  | 179.36(4) | Cl3-Sn1-Cl7  | 179.39(3) | Cl3-Sn1-Cl1    | 90.71(6)  |
| Cl3-Sn1-Cl6  | 89.59(3)  | Cl3-Sn1-Cl8  | 90.89(2)  | Cl3-Sn1-Cl1    | 89.29(6)  |
| Cl3-Sn1-Cl2  | 88.52(3)  | Cl8-Sn1-Cl4  | 89.40(2)  | Cl3-Sn1-Cl1    | 89.29(6)  |
| Cl2-Sn1-Cl6  | 89.47(3)  | Cl8-Sn1-Cl7  | 88.50(2)  | Cl2-Sn1-Cl2    | 180.0     |
| Cl5-Sn1-Cl1  | 93.22(3)  | Cl6-Sn1-Cl5  | 93.19(2)  | Cl1-Sn1-Cl2    | 89.98(7)  |
| Cl5-Sn1-Cl6  | 179.24(3) | Cl6-Sn1-Cl4  | 179.15(2) | Cl1-Sn1-Cl2    | 90.02(7)  |
| Cl5-Sn1-Cl4  | 89.98(3)  | Cl6-Sn1-Cl7  | 89.95(2)  | Cl1-Sn1-Cl2    | 90.02(7)  |
| Cl5-Sn1-Cl3  | 89.95(3)  | Cl6-Sn1-Cl3  | 90.01(2)  | Cl1-Sn1-Cl2    | 89.98(7)  |
| Cl3-Sn1-Cl2  | 89.91(3)  | Cl4-Sn1-Cl8  | 90.10(2)  | Cl1-Sn1-Cl1    | 180.00(8) |

|            |          |             |            |            |           |
|------------|----------|-------------|------------|------------|-----------|
| C2-C1-Cl7  | 119.7(3) | C3-C2-Cl1   | 119.6(2)   | C7-C6-Cl4  | 119.6(3)  |
| C6-C1-Cl7  | 118.6(3) | C1-C2-Cl1   | 118.9(2)   | C5-C6-Cl4  | 118.5(3)  |
| C13-C8-Cl8 | 119.5(3) | C9-C10-Cl2  | 119.8(2)   | C7-C6-C5   | 122.1(8)  |
| C9-C8-Cl8  | 119.1(3) | C11-C10-Cl2 | 118.7(2)   | C8-C7-C6   | 120.2(10) |
| N2-C14-C16 | 108.3(2) | N1-C7-C8    | 108.34(18) | N1-C2-C1   | 108.6(2)  |
| N2-C14-C11 | 110.3(2) | N1-C7-C5    | 110.23(18) | N1-C2-C3   | 110.4(2)  |
| N1-C7-C4   | 110.3(2) | N2-C15-C13  | 110.18(17) | N2-C10-C11 | 110.2(2)  |
| N1-C7-C15  | 109.4(2) | N2-C15-C16  | 109.21(19) | N2-C10-C9  | 109.6(3)  |

**Table S4.** Crystallographic data and structure refinement details for *R-F*, *S-F* and *rac-F*.

| Identification code                                          | <i>R-F</i>                                                                       | <i>S-F</i>                                                                       | <i>rac-F</i>                                                                     |
|--------------------------------------------------------------|----------------------------------------------------------------------------------|----------------------------------------------------------------------------------|----------------------------------------------------------------------------------|
| Empirical formula                                            | C <sub>16</sub> H <sub>22</sub> Cl <sub>6</sub> F <sub>2</sub> N <sub>2</sub> Sn | C <sub>16</sub> H <sub>22</sub> Cl <sub>6</sub> F <sub>2</sub> N <sub>2</sub> Sn | C <sub>16</sub> H <sub>20</sub> Cl <sub>6</sub> F <sub>2</sub> N <sub>2</sub> Sn |
| Formula weight                                               | 611.74                                                                           | 611.74                                                                           | 611.74                                                                           |
| Temperature/K                                                | 100                                                                              | 100                                                                              | 100                                                                              |
| Crystal system                                               | monoclinic                                                                       | monoclinic                                                                       | monoclinic                                                                       |
| Space group                                                  | <i>P</i> 2 <sub>1</sub>                                                          | <i>P</i> 2 <sub>1</sub>                                                          | <i>P</i> 2 <sub>1</sub> / <i>c</i>                                               |
| <i>a</i> /Å                                                  | 12.2505(2)                                                                       | 12.2157(11)                                                                      | 13.9427(7)                                                                       |
| <i>b</i> /Å                                                  | 7.16270(10)                                                                      | 7.1438(5)                                                                        | 7.1499(3)                                                                        |
| <i>c</i> /Å                                                  | 14.0193(2)                                                                       | 13.9697(15)                                                                      | 12.4112(6)                                                                       |
| $\alpha$ /°                                                  | 90                                                                               | 90                                                                               | 90                                                                               |
| $\beta$ /°                                                   | 110.504(2)                                                                       | 110.521(11)                                                                      | 109.933(5)                                                                       |
| $\gamma$ /°                                                  | 90                                                                               | 90                                                                               | 90                                                                               |
| Volume/Å <sup>3</sup>                                        | 1152.21(3)                                                                       | 1141.73(19)                                                                      | 1163.14(10)                                                                      |
| <i>Z</i>                                                     | 2                                                                                | 2                                                                                | 2                                                                                |
| $\rho_{\text{calc}}$ /cm <sup>3</sup>                        | 1.763                                                                            | 1.779                                                                            | 1.747                                                                            |
| $\mu$ /mm <sup>-1</sup>                                      | 15.420                                                                           | 1.842                                                                            | 15.275                                                                           |
| <i>F</i> (000)                                               | 604.0                                                                            | 604.0                                                                            | 604.0                                                                            |
| Reflections collected                                        | 11681                                                                            | 17763                                                                            | 6707                                                                             |
| Data/restraints/parameters                                   | 4590/1/248                                                                       | 5641/1/248                                                                       | 2338/0/126                                                                       |
| Goodness-of-fit on <i>F</i> <sup>2</sup>                     | 1.054                                                                            | 1.072                                                                            | 1.074                                                                            |
| Final <i>R</i> indexes [ <i>I</i> > 2 $\sigma$ ( <i>I</i> )] | <i>R</i> <sub>1</sub> = 0.0412, <i>wR</i> <sub>2</sub> = 0.1098                  | <i>R</i> <sub>1</sub> = 0.0209, <i>wR</i> <sub>2</sub> = 0.0481                  | <i>R</i> <sub>1</sub> = 0.0502, <i>wR</i> <sub>2</sub> = 0.1339                  |
| Final <i>R</i> indexes [all data]                            | <i>R</i> <sub>1</sub> = 0.0417, <i>wR</i> <sub>2</sub> = 0.1101                  | <i>R</i> <sub>1</sub> = 0.0222, <i>wR</i> <sub>2</sub> = 0.0486                  | <i>R</i> <sub>1</sub> = 0.0543, <i>wR</i> <sub>2</sub> = 0.1370                  |
| Flack parameter                                              | -0.016(6)                                                                        | -0.019(11)                                                                       | 1.043                                                                            |
| CCDC                                                         | 2207679                                                                          | 2207678                                                                          | 2210697                                                                          |

**Table S5.** Selected bond lengths (Å) for *R-F*, *S-F* and *rac-F*.

| <i>R-F</i> |            | <i>S-F</i> |           | <i>rac-F</i>           |            |
|------------|------------|------------|-----------|------------------------|------------|
| Sn1-Cl5    | 2.4632(16) | Sn1-Cl5    | 2.3997(9) | Sn1-Cl5                | 2.4200(11) |
| Sn1-Cl3    | 2.4313(16) | Sn1-Cl6    | 2.4162(8) | Sn1-Cl5 <sup>[a]</sup> | 2.4200(11) |
| Sn1-Cl1    | 2.4232(13) | Sn1-Cl2    | 2.4301(8) | Sn1-Cl6                | 2.4201(12) |
| Sn1-Cl6    | 2.4080(16) | Sn1-Cl1    | 2.4051(9) | Sn1-Cl6 <sup>[a]</sup> | 2.4201(12) |
| Sn1-Cl4    | 2.4358(13) | Sn1-Cl4    | 2.4568(8) | Sn1-Cl4                | 2.4315(12) |
| Sn1-Cl2    | 2.4054(16) | Sn1-Cl3    | 2.4291(8) | Sn1-Cl4 <sup>[a]</sup> | 2.4315(12) |
| N1-C7      | 1.500(8)   | N2-C10     | 1.505(4)  | N1-C2                  | 1.482(7)   |
| N2-C16     | 1.521(7)   | N1-C7      | 1.515(4)  | F1-C6                  | 1.356(7)   |
| F1-C2      | 1.360(8)   | F2-C14     | 1.362(4)  |                        |            |
| F2-C10     | 1.366(9)   | F1-C2      | 1.363(4)  |                        |            |

Symmetrical code for (*rac*-FMBA)<sub>2</sub>SnCl<sub>6</sub>: [a] 1-X, 1-Y, 1-Z;

**Table S6.** Selected bond angles (°) for *R-F*, *S-F* and *rac-F*.

| <i>R-F</i>  |          | <i>S-F</i>  |           | <i>rac-F</i>                               |          |
|-------------|----------|-------------|-----------|--------------------------------------------|----------|
| Cl3-Sn1-Cl5 | 89.79(6) | Cl5-Sn1-Cl6 | 90.66(3)  | Cl5-Sn1-Cl5 <sup>[a]</sup>                 | 180.0    |
| Cl3-Sn1-Cl4 | 87.47(6) | Cl5-Sn1-Cl2 | 177.06(3) | Cl5 <sup>[a]</sup> -Sn1-Cl6 <sup>[a]</sup> | 90.95(4) |
| Cl1-Sn1-Cl5 | 90.49(6) | Cl5-Sn1-Cl1 | 92.75(3)  | Cl5-Sn1-Cl6 <sup>[a]</sup>                 | 89.05(4) |
| Cl1-Sn1-Cl3 | 90.59(6) | Cl5-Sn1-Cl4 | 87.47(3)  | Cl5 <sup>[a]</sup> -Sn1-Cl6                | 89.05(4) |

|             |           |             |           |                                            |          |
|-------------|-----------|-------------|-----------|--------------------------------------------|----------|
| Cl1-Sn1-Cl4 | 177.94(5) | Cl5-Sn1-Cl3 | 91.31(3)  | Cl5-Sn1-Cl6                                | 90.95(4) |
| Cl6-Sn1-Cl5 | 87.51(6)  | Cl6-Sn1-Cl2 | 90.65(3)  | Cl5-Sn1-Cl4                                | 91.33(4) |
| Cl6-Sn1-Cl3 | 177.04(7) | Cl6-Sn1-Cl4 | 90.50(3)  | Cl5-Sn1-Cl4 <sup>[a]</sup>                 | 88.67(4) |
| Cl6-Sn1-Cl1 | 90.65(6)  | Cl6-Sn1-Cl3 | 177.87(3) | Cl5 <sup>[a]</sup> -Sn1-Cl4                | 88.67(4) |
| Cl6-Sn1-Cl4 | 91.26(6)  | Cl2-Sn1-Cl4 | 89.89(3)  | Cl5 <sup>[a]</sup> -Sn1-Cl4 <sup>[a]</sup> | 91.33(4) |
| Cl4-Sn1-Cl5 | 88.82(6)  | Cl1-Sn1-Cl6 | 90.21(3)  | Cl6-Sn1-Cl6 <sup>[a]</sup>                 | 180.0    |
| Cl2-Sn1-Cl5 | 179.14(7) | Cl1-Sn1-Cl2 | 89.87(3)  | Cl6 <sup>[a]</sup> -Sn1-Cl4                | 90.20(4) |
| Cl2-Sn1-Cl3 | 89.92(6)  | Cl1-Sn1-Cl4 | 179.26(4) | Cl6-Sn1-Cl4 <sup>[a]</sup>                 | 90.20(4) |
| Cl2-Sn1-Cl1 | 90.33(6)  | Cl1-Sn1-Cl3 | 90.49(4)  | Cl6 <sup>[a]</sup> -Sn1-Cl4                | 89.80(4) |
| Cl2-Sn1-Cl6 | 92.76(5)  | Cl3-Sn1-Cl2 | 87.35(3)  | Cl6-Sn1-Cl4                                | 89.80(4) |
| Cl2-Sn1-Cl4 | 90.36(7)  | Cl3-Sn1-Cl4 | 88.79(3)  | Cl4-Sn1-Cl4 <sup>[a]</sup>                 | 180.0    |
| C11-C10-F2  | 118.4(9)  | C13-C14-F2  | 119.1(4)  | C7-C6-F1                                   | 118.8(7) |
| C15-C10-F2  | 118.7(8)  | C15-C14-F2  | 118.3(4)  | C5-C6-F1                                   | 118.5(5) |
| C3-C2-F1    | 119.1(7)  | C3-C2-F1    | 119.4(4)  | N1-C2-C3                                   | 112.2(3) |
| C1-C2-F1    | 118.4(8)  | C1-C2-F1    | 117.9(4)  | N1-C2-C1                                   | 109.5(3) |
| N1-C7-C5    | 110.9(5)  | N2-C10-C9   | 109.8(4)  |                                            |          |
| N1-C7-C8    | 108.3(6)  | N2-C10-C11  | 118.8(4)  |                                            |          |
| N2-C16-C17  | 109.2(5)  | N1-C7-C8    | 110.3(4)  |                                            |          |
| N2-C16-C13  | 109.5(5)  | N1-C7-C5    | 113.6(4)  |                                            |          |

## Supplementary Figures

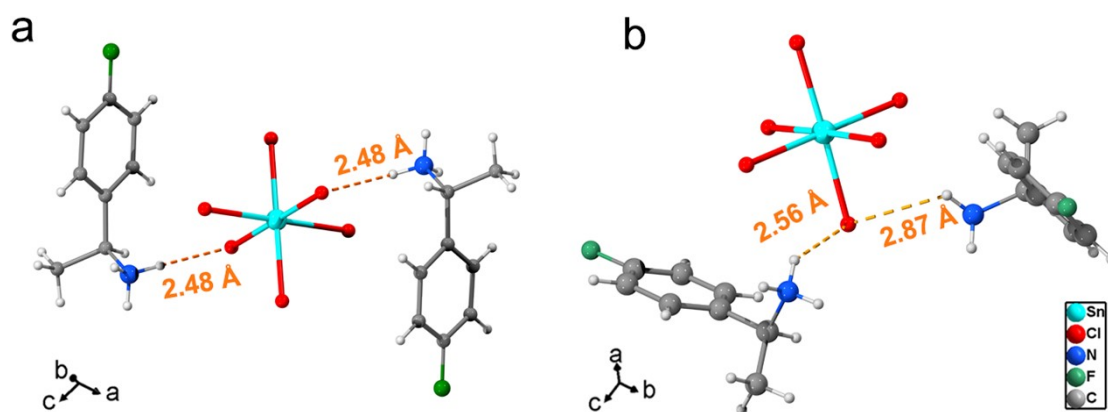

**Figure S1.** Crystal structures of (a) *rac*-F and (b) *S*-F. N-H...Cl-Sn hydrogen bonding interactions between the organic cation and inorganic scaffolds are marked by the dotted orange lines.

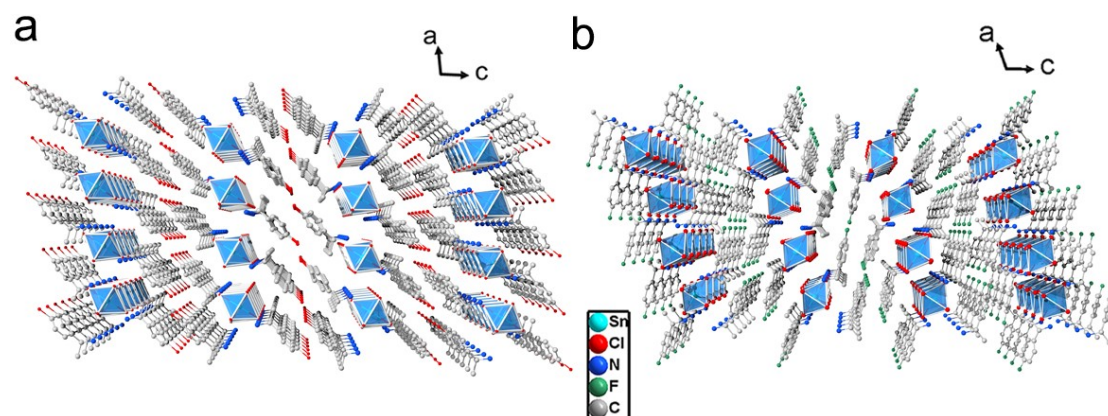

**Figure S2.** View of packing framework of (a) *S*-Cl and (b) *S*-F.

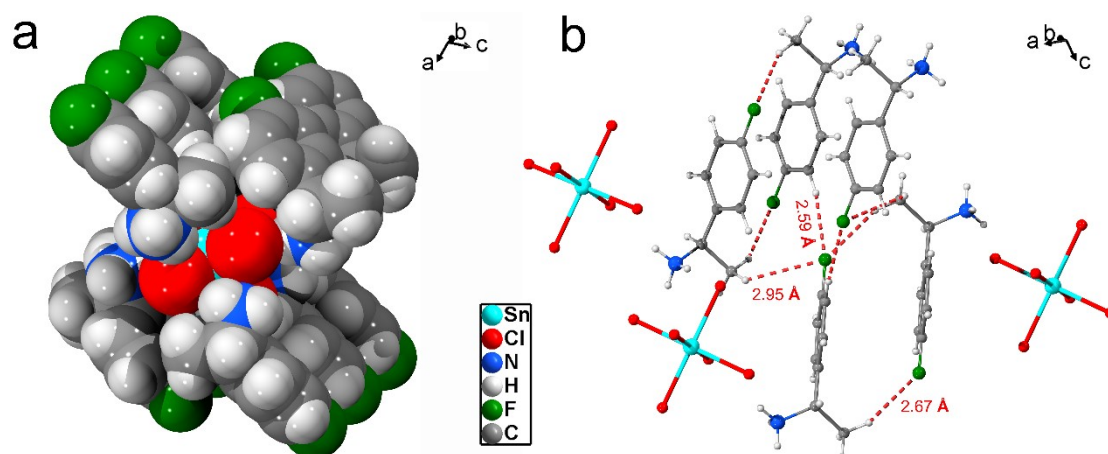

**Figure S3.** (a) Core-shell structure and (b) multiple C-H...F hydrogen bonding interactions of *S*-F.

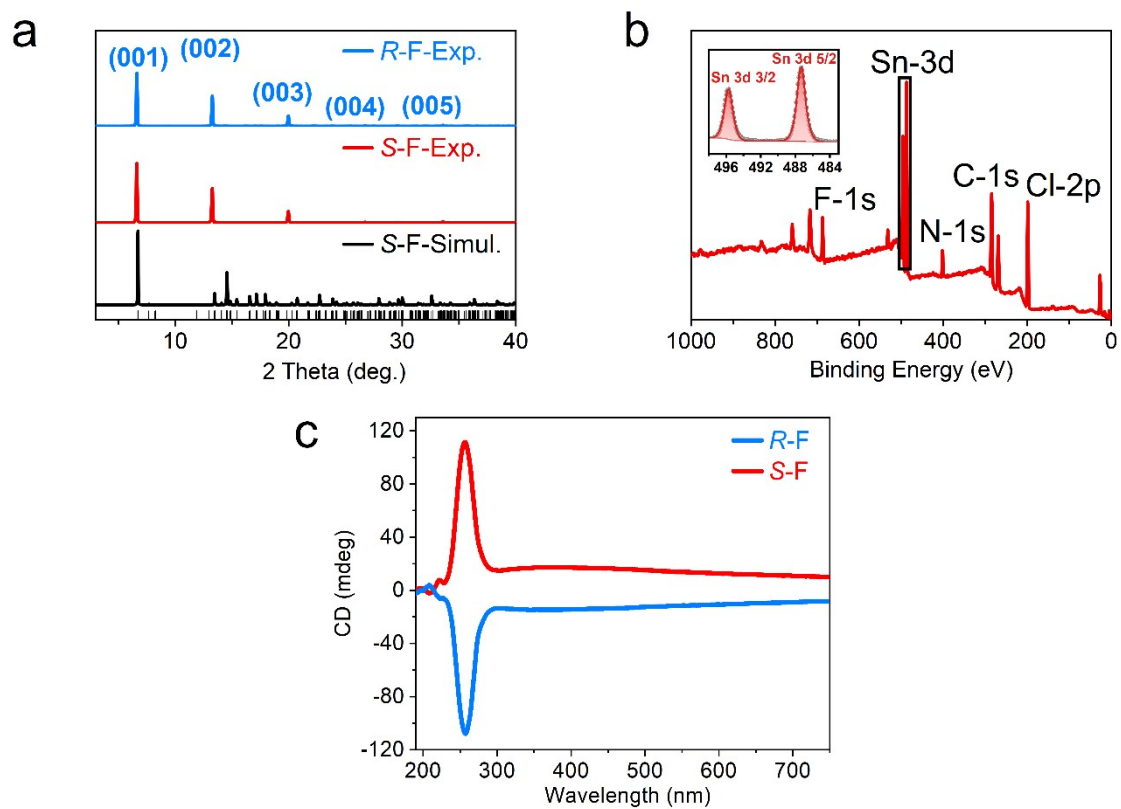

**Figure S4.** PXRD patterns of (a) *R*-/*S*-F. (b) XPS survey scans of *S*-F. Inset: High resolution XPS spectra and peak fitting for Sn 3d. (c) CD spectra of *R*-/*S*-F.



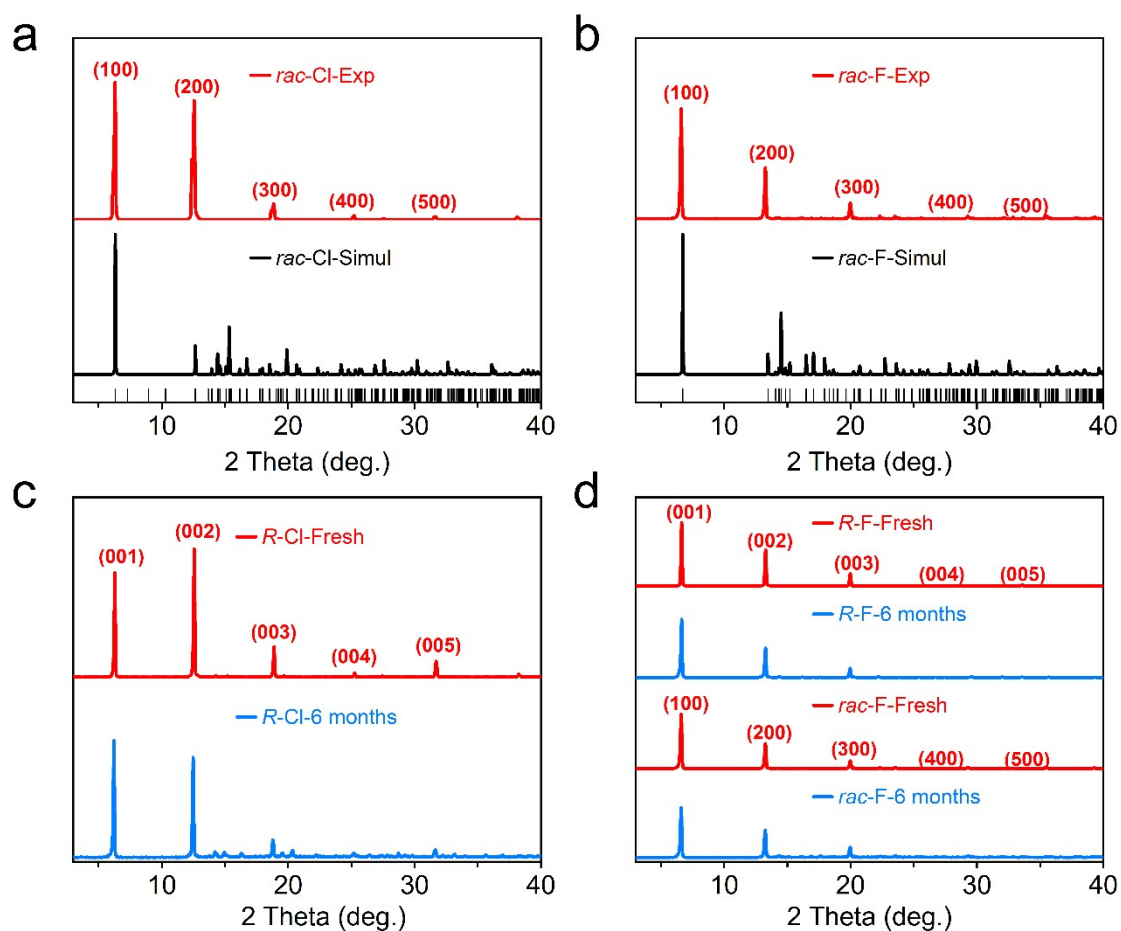

**Figure S5.** (a) PXRD patterns of *rac*-Cl, (b) *rac*-F. PXRD patterns of (c) *R*-Cl, (d) *R*-*rac*-F recorded at same time interval from the day one of synthesis.

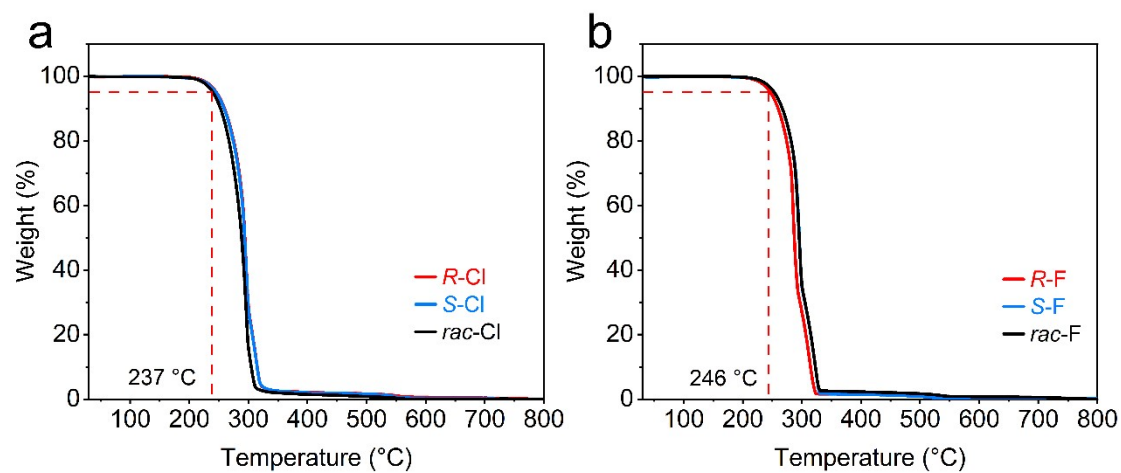

**Figure S6.** Thermal stability of (a) *R*-*S*-*rac*-Cl and (b) *R*-*S*-*rac*-F.

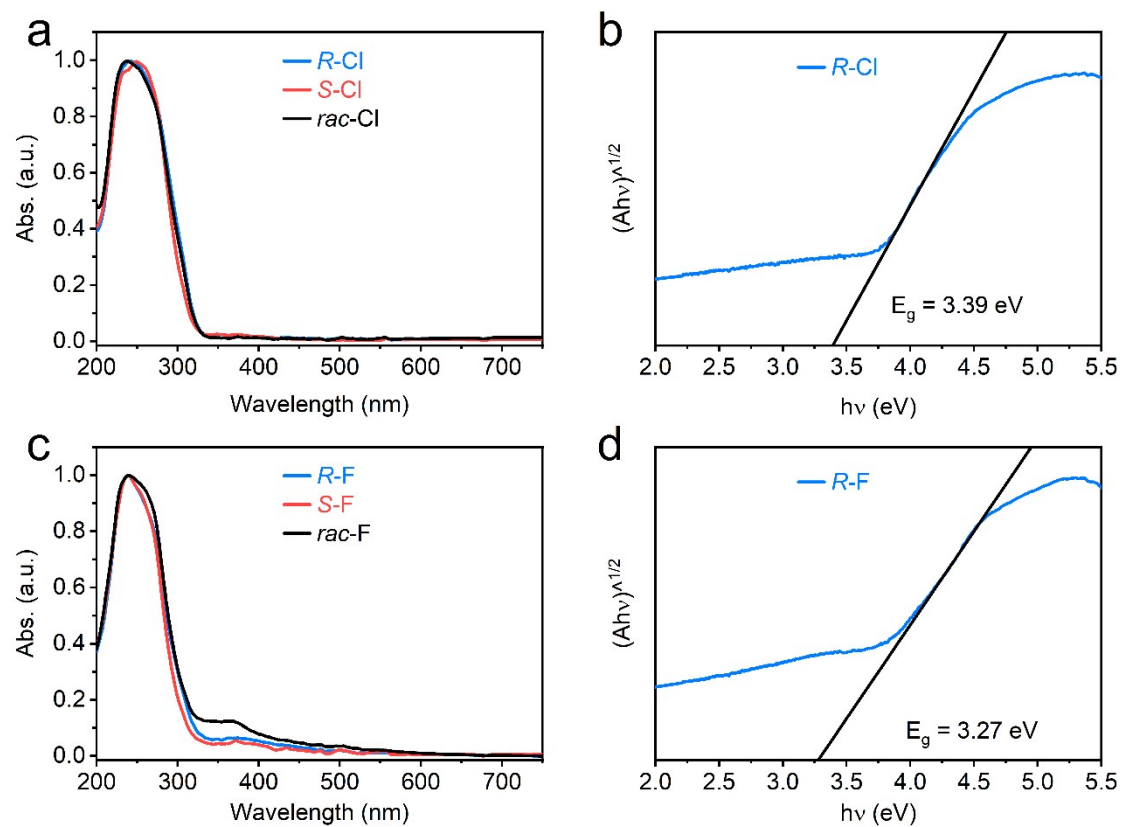

**Figure S7.** (a) Absorption spectra of *R*-/*S*-/*rac*-Cl. (b) The optical bandgap of *R*-Cl calculated from corresponding Tauc plot. (c) Absorption spectra of *R*-/*S*-/*rac*-F. (d) The optical bandgap of *R*-F calculated from corresponding Tauc plot.

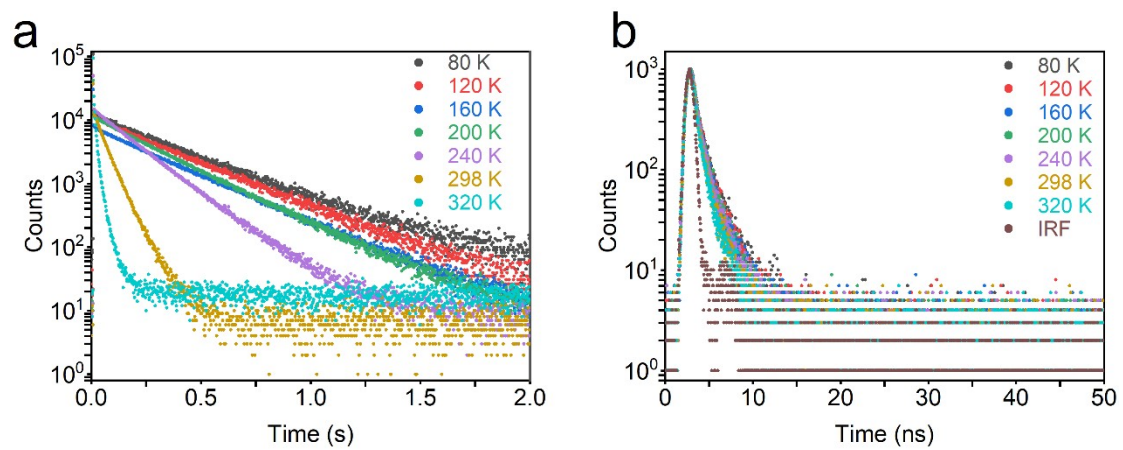

**Figure S8.** Photoluminescence decay profiles of *rac*-F at (a) 398 nm and (b) 516 nm from 80–320 K.

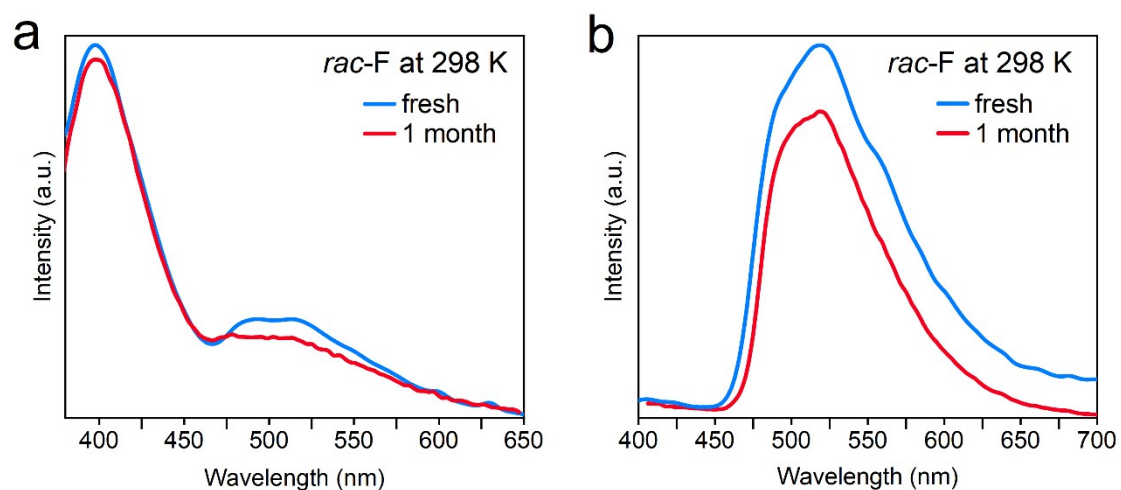

**Figure S9.** (a) Prompt and (b) delayed PL spectra of fresh *rac-F* sample and the one exposed in ambient atmosphere over one month.

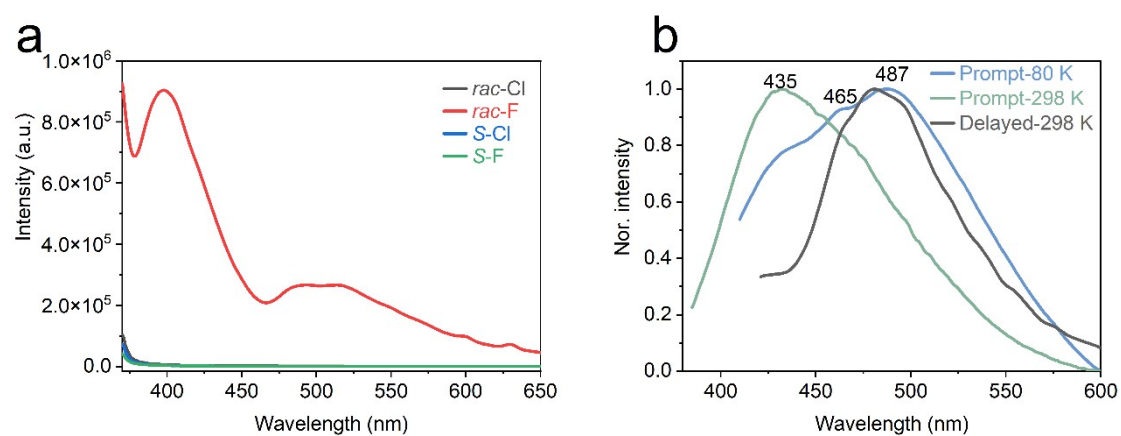

**Figure S10.** (a) Prompt PL spectra of *rac-F* and other Sn halides at the same test condition. (b) Normalized prompt and delay PL spectra of *rac-FMBA-HCl*.

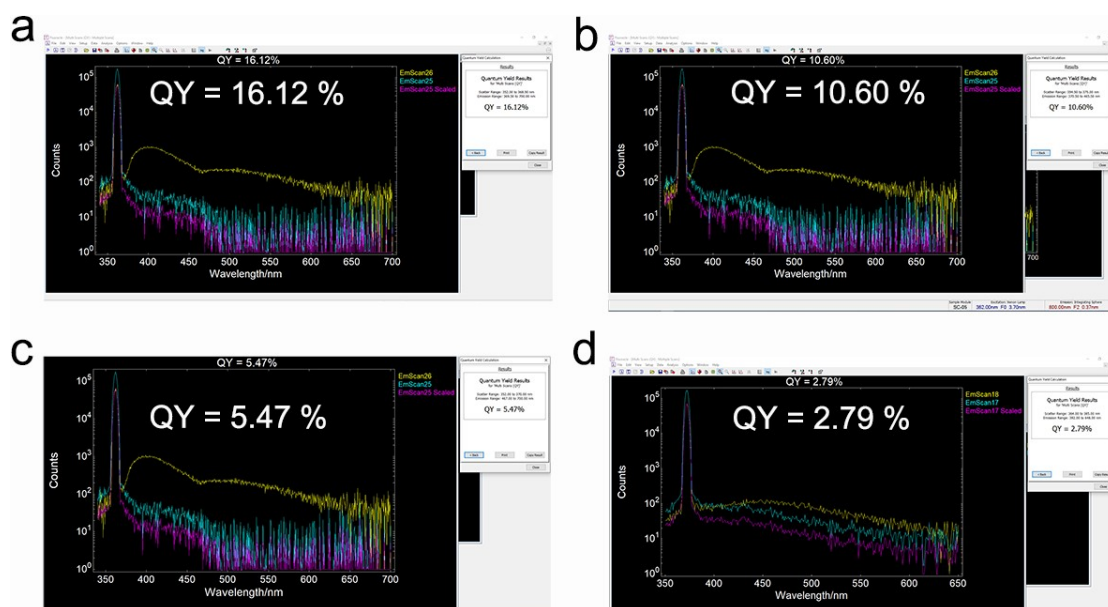

**Figure S11.** The (a) total PL quantum yield, (b) fluorescence quantum yield, (c) phosphorescence quantum yield of *rac*-F, and (d) total PL quantum yield of *rac*-FMBA-HCl.

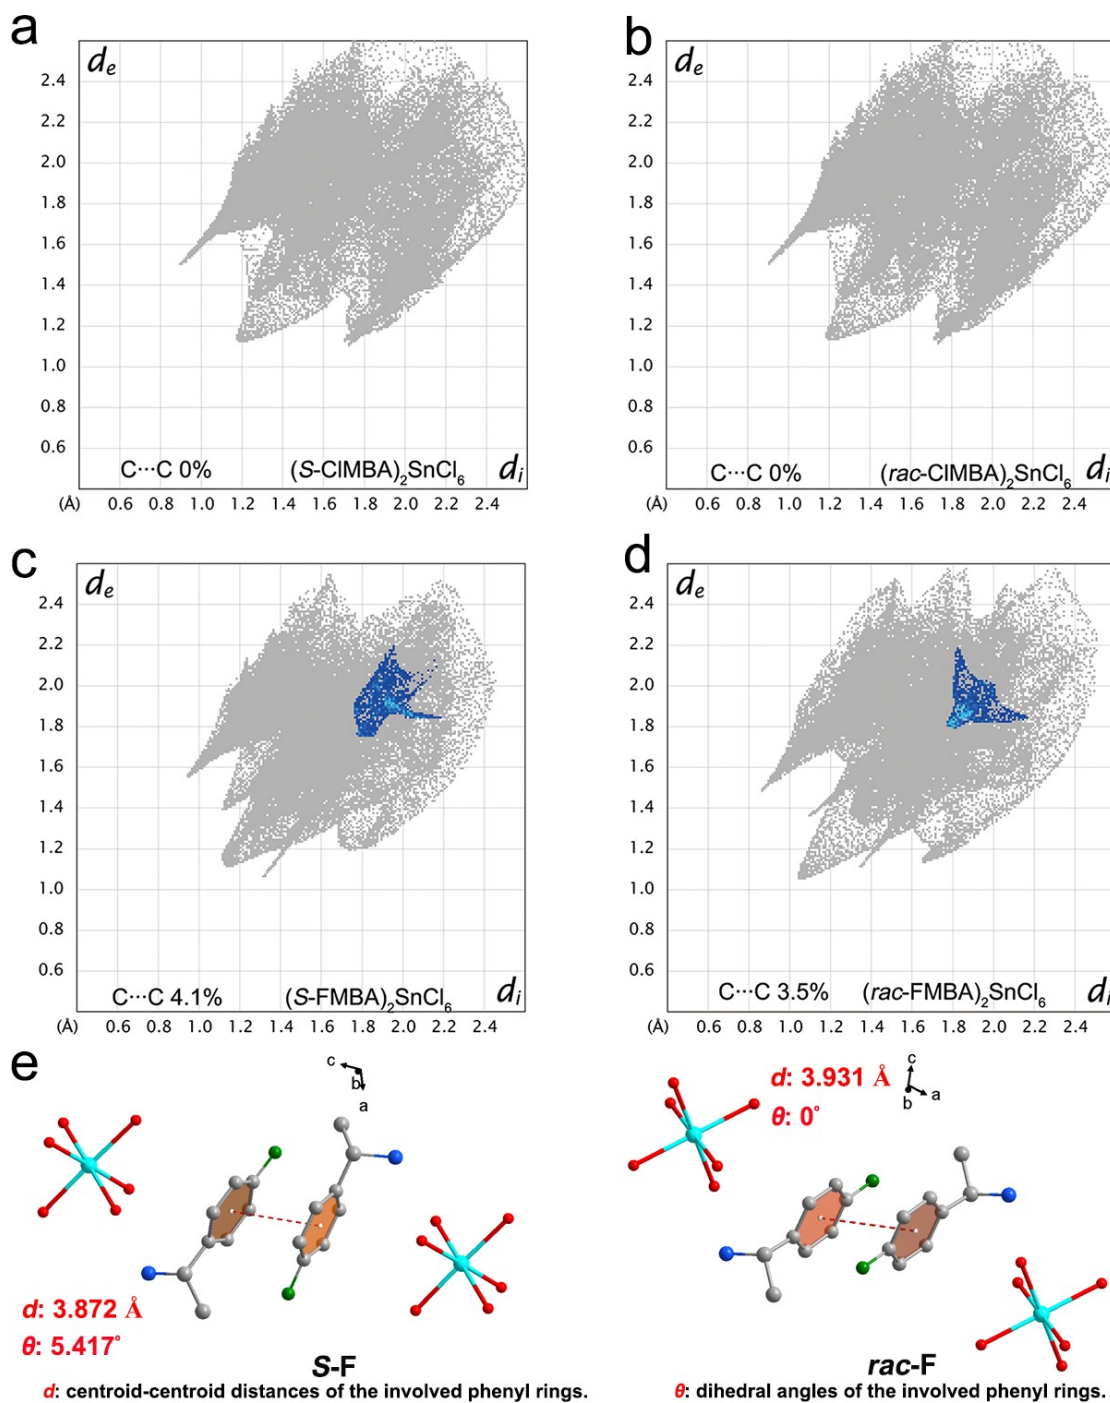

**Figure S12.** (a-d) 2D fingerprint plots. (e)  $\pi$ - $\pi$  interactions of the involved phenyl rings in the *S-F* and *rac-F* crystals. Insert:  $d_i$  is the distance between the Hirshfeld surface and the nearest atom inside the Hirshfeld surface, while  $d_e$  is the distance between the Hirshfeld surface and the nearest atom outside the Hirshfeld surface. The intense of the color in the fingerprint plots represents the contribution of a pair ( $d_i$ ,  $d_e$ ) on the Hirshfeld surface;  $d$ : centroid-centroid distances of the involved phenyl rings;  $\theta$ : dihedral angles of the involved rings.

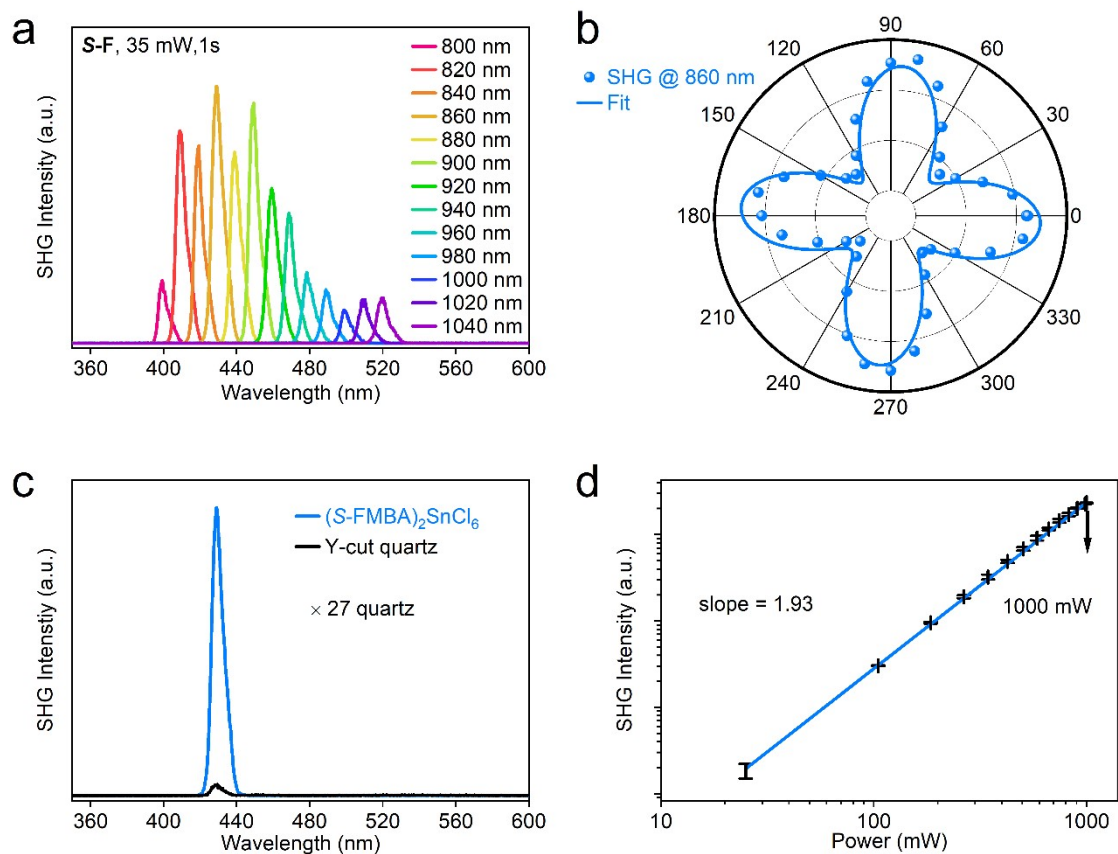

**Figure S13.** (a) NLO spectra of the  $S-F$  crystal pumped at various wavelengths. (b) Polarization dependence of the SHG intensity from a vertical oriented  $S-F$  crystal as function of the linear polarization angle. The polarization ratio up to 70.8%. Excitation and detection wavelengths are 860 and 430 nm, respectively (c) The comparison of SHG signal intensities of  $S-F$  and quartz at 860 nm under the same test conditions. (d) Logarithmic plot of SHG intensity as function of the incident power. The solid line is a linear fit with a slope of  $\sim 1.93$ .

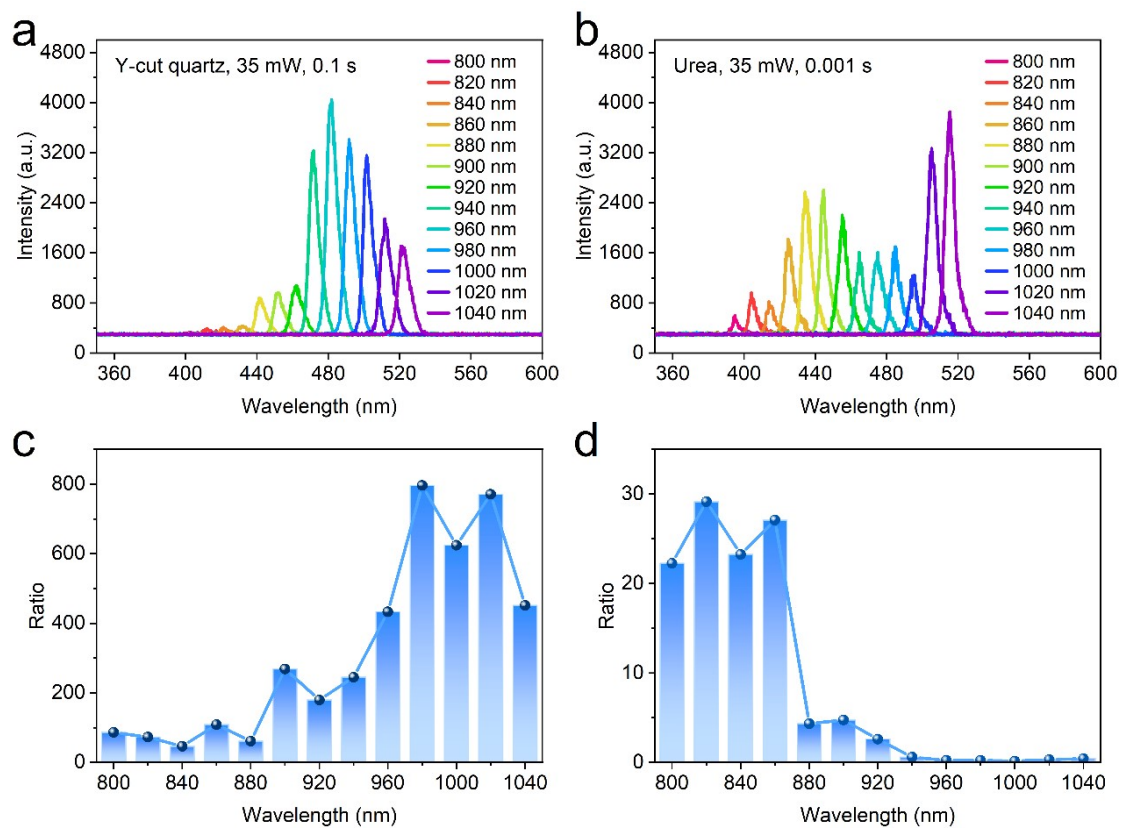

**Figure S14.** The SHG spectra of (a) Y-cut quartz and (b) urea at different wavelengths. The SHG intensity ratio of (c) S-CI to Y-cut quartz and (d) S-F to Y-cut quartz.

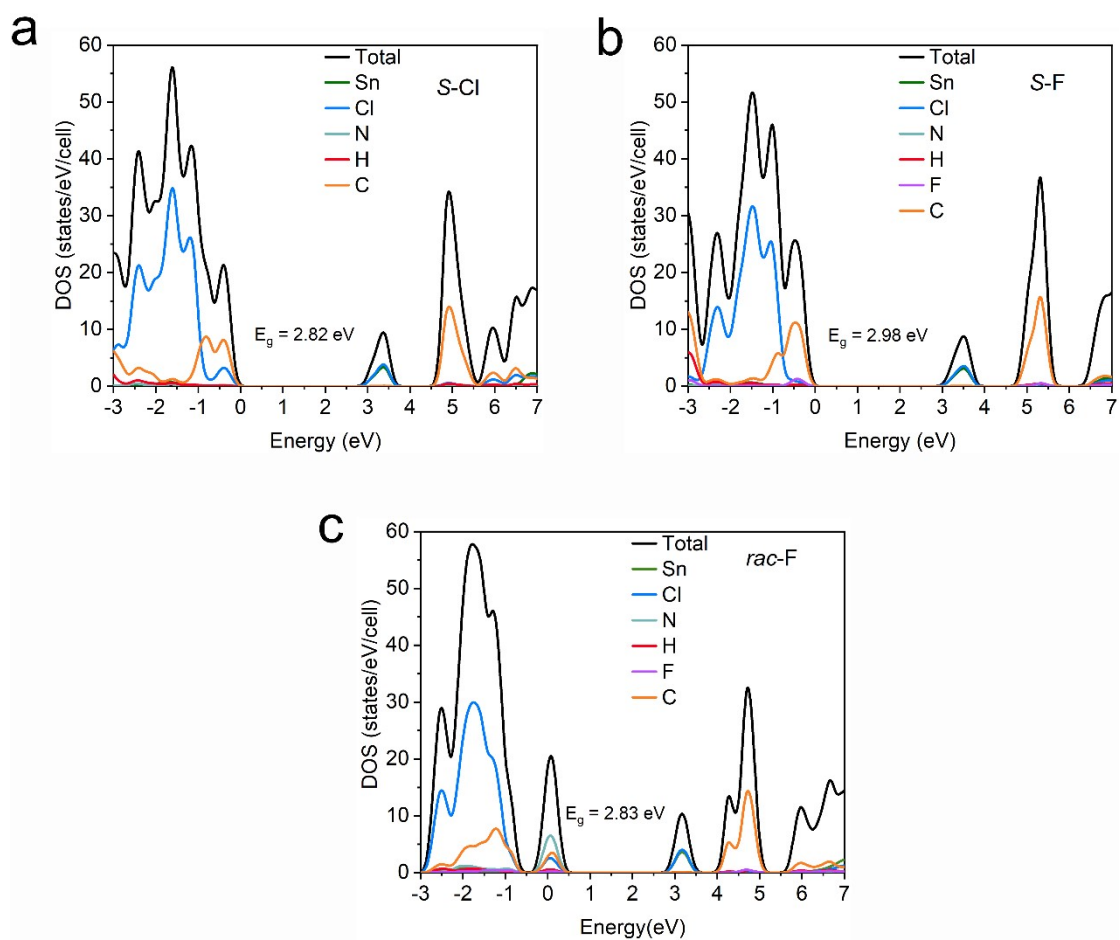

**Figure S15.** DOS of (a) *S-Cl*, (b) *S-F* and (c) *rac-F* projected on the constituent elements.

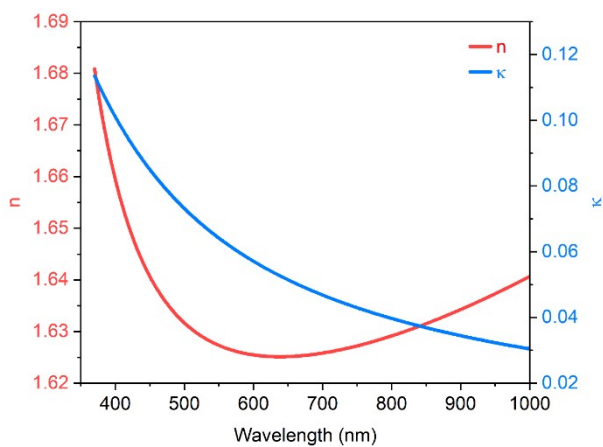

**Figure S16.** Refractive index ( $n$ ) and extinction coefficient ( $\kappa$ ) values of *S-Cl*.



## Supplementary References

- 1 O. V. Dolomanov, L. J. Bourhis, R. J. Gildea, J. A. K. Howard and H. Puschmann, *J. Appl. Crystallogr.*, 2009, **42**, 339-341.
- 2 G. Kresse and J. Furthmüller, *Phys. Rev. B*, 1996, **54**, 11169-11186.
- 3 G. Kresse and D. Joubert, *Phys. Rev. B* 1999, **59**, 1758-1775.
- 4 J. P. Perdew, K. Burke and M. Ernzerhof, *Phys. Rev. Lett.*, 1996, **77**, 3865-3868.
- 5 J. Klimeš, D. R. Bowler and A. Michaelides, *Phys. Rev. B*, 2011, **83**, 195131.
- 6 J. Heyd and G. E. Scuseria, *J. Chem. Phys.*, 2004, **121**, 1187-1192.
- 7 A. Hermans, *Low-Temperature Processed Thin Films of Second-Order Nonlinear Optical Materials for Silicon Nitride Photonic Integrated Circuits*, Ghent University, Faculty of Engineering and Architecture, 2019.
- 8 S. Semin, X. Li, Y. Duan and T. Rasing, *Adv. Opt. Mater.*, 2021, **9**, 2100327.
